# Supplementary material for: Synthesis of stack plate covalent organic framework nanotubes using a self-assembled acid as a soft template
Source: Royal Society of Chemistry journal article supplement (doi:10.1039/d2cc01735k), 2022-01-01
Supplement: d2cc01735k1.pdf [file d2cc01735k1.pdf]

## *Supporting Information*

### **Synthesis of Stack Plate Covalent Organic Framework Nanotubes using Self-Assembled Acid as a Soft Template**

*Dan Wu, <sup>ab†</sup> Dandan Han, <sup>c†</sup> Yong Zhou, <sup>a</sup> Zhen Zhang, <sup>b</sup> Hang Qian, <sup>b</sup> Qian Zhou, <sup>c</sup>  
Yongsheng Zhang, <sup>b</sup> Andrei Y. Khodakov, <sup>\*a</sup> and Vitaly V. Ordonsky <sup>\*a</sup>*

<sup>a</sup> *Univ. Lille, CNRS, Centrale Lille, ENSCL, Univ. Artois, UMR 8181 – UCCS – Unité de  
Catalyse et Chimie du Solide, F-59000 Lille, France, E-mail: [vitaly.ordonsky@univ-lille.fr](mailto:vitaly.ordonsky@univ-lille.fr);  
[andrei.khodakov@univ-lille.fr](mailto:andrei.khodakov@univ-lille.fr);*

<sup>b</sup> *School of Chemical Engineering, Zhengzhou University, Zhengzhou, 450001, People's  
Republic of China*

<sup>c</sup> *College of Science, Henan Agricultural University, Zhengzhou, Henan 450002,  
People's Republic of China*

*† These authors contributed equally to this work and should be considered co-first  
authors.*

## Table of contents

|                                                                                                                                |    |
|--------------------------------------------------------------------------------------------------------------------------------|----|
| Experimental section.....                                                                                                      | 2  |
| Figure S1. FTIR analysis of the precursor of PDA, TMA and TFA. ....                                                            | 6  |
| Figure S2. TG analysis of the COF-LZU1 and COF-LZU1-NT. ....                                                                   | 7  |
| Figure S3. (a) XRD patterns and (b) SEM image of COF-LZU1-NT after calcination at 250°C for 1h under nitrogen atmosphere. .... | 8  |
| Figure S4. XRD patterns of COF-LZU1-NT after treatment in different conditions. ....                                           | 9  |
| Figure S5. SEM image of TMA self-assemblies .....                                                                              | 10 |
| Figure S6. XRD pattern of COF-LZU1-NT with TMA template inside. ....                                                           | 11 |
| Figure S7. FTIR analysis of COF-LZU1-NT with TMA template inside. ....                                                         | 12 |
| Figure S8. XRD patterns of COF-LZU1-NT synthesized under (a) various solvents and (b) different temperatures. ....             | 14 |
| Figure S9. Contact angle of COF-LZU1-NT and COF-LZU1 .....                                                                     | 15 |

## 1. Experimental Section

### 1.1. Materials

1,3,5-triformylbenzene, *p*-phenylenediamine, trimesic acid, 1,4-dioxane, acetic acid, tetrahydrofuran and acetone were supplied by Sigma-Aldrich company. Oleic acid, silicone oil, n-dodecane, squalene and Sudan III were purchased from Aladdin Chemical company. Deionized water was obtained from a Millipore system. All chemicals were analytical grade and used as received without further purification.

### 1.2. Synthetic procedures

**COF-LZU1:** 160 mg of 1,3,5-triformylbenzene were dissolved in 10 ml 1,4-dioxane in a 50 ml glass bottle. The solution was subjected to ultrasonic for 10 min and stirring for 10 min. Then, 160 mg of *p*-phenylenediamine were added to the solution and stirred for another 10 min. Next, 0.2 ml of 3 M acetic acid aqueous solution were added with continuous stirring for 30 min. The obtained solution with yellow precipitates was sealed with the cap and stood for 3 days at ambient conditions. The produced yellow precipitates were separated by centrifugation and then washed by tetrahydrofuran and acetone 3 times, respectively. After drying at 60 °C overnight, the obtained yellow powders were subjected to solvent exchange with methanol 3 times at 80 °C. The resulting COF-LZU1 was finally collected after drying at 120 °C overnight.

**COF-LZU1-NT:** 80 mg of TFA and 40 mg of TMA were firstly dissolved in 10 ml dioxane with a 50 ml glass bottle. The solution was subjected to ultrasonic for 10 min and stirred for 10 min to get a clear solution. Then, 160 mg PDA was added to the solution and stirred for another 10 min. Next, 0.2 ml of 3 M acetic acid solution were added to the solution with continuous stirring for 24 h. The obtained solution with green

precipitates was sealed with the caps and stood for 2 days at ambient conditions. The produced green precipitates were separated by centrifugation, followed by the washing of tetrahydrofuran and acetone 3 times. After drying at 60 °C overnight, the obtained green powders were treated by the solvent-exchange with methanol 3 times at 80 °C. Finally, the dark-yellow-like COF-LZU1-NT was obtained after drying at 120 °C overnight.

### **1.3. Characterizations**

The X-ray diffraction (XRD) was recorded on a PANalytical Empyrean X-ray diffractometer in Bragg-Brentano configuration with the 0.02° step size and 1 s step time, during which the Cu K $\alpha$  radiation (40 kV and 30 mA) was used as the X-ray source. The crystalline phases were identified by comparing the diffraction patterns with those of the standard powder XRD files (JCPDS).

The surface areas and pore size were measured by N<sub>2</sub> adsorption-desorption isotherms (Micromeritics, physisorption analyzer, ASAP 2020). Before the measurements, the samples were outgassed at 393 K for 6 h. The specific surface area was calculated by the Brunauer–Emmett–Teller (BET) method. The total pore volume was determined from the amount of adsorbed nitrogen under a relative pressure of about 0.99. The pore size distributions were calculated from nitrogen isotherms using the nonlocal density functional theory (NLDFT) method.

The scanning electron microscope (SEM) and energy-dispersive X-ray spectroscopy (EDS) were carried out on Zeiss Ultra-55 microscope operated at 2 kV.

For transmission electron microscopy (TEM) analysis, the scanning mode was performed on a JEOL 2100 FEG S/TEM microscope with an operating voltage of 200 kV and equipped with a spherical aberration probe corrector. Before analysis, the

samples were dispersed in ethanol and deposited on a holey carbon-coated TEM grid. The Fourier transform infrared (FTIR) spectra were recorded using a Thermo Fisher Scientific Nicolet 6700 FTIR (32 scans at a resolution of 4 cm<sup>-1</sup>) equipped with a mercury cadmium telluride (MCT) detector.

The solid-state <sup>1</sup>H, <sup>13</sup>C, and <sup>15</sup>N Nuclear Magnetic Resonance (NMR) spectra were measured at 9.4 T on a Bruker Avance 400 spectrometer with a 4 mm probe. A double air-bearing probe and a zirconium oxide rotor were utilized. The acquisition was performed with a standard CP pulse sequence. The spinning speed was 12.5 kHz for <sup>13</sup>C and 5 kHz for <sup>15</sup>N CPMAS (Cross Polarization Magic Angle Spinning) and 12.5 kHz for <sup>1</sup>H MAS

The thermal gravimetric (TG) analysis of COFs was performed on a Simultaneous Thermal Analyzer (STA) 8000 in a temperature range of 100 to 600 °C under a nitrogen atmosphere with a heating rate of 10 °C/min.

#### **1.4. Adsorption of oil**

A certain amount of COFs materials ( $m_1$ ) were placed on a glass plate. Then, the oil selected from oleic acid, silicone oil, *n*-dodecane, squalene, cooking oil was dropwise added using the micro-syringe, thoroughly mixing the oil and COFs by rubbing with the spatula. Until a stiff paste was produced, the COFs with oils were weighed. The test was repeated 3 times and the weight measurements were averaged ( $m_2$ ). The adsorption capacity was calculated according to the following equation:

$$\text{Adsorption capacity} = \frac{m_2 - m_1}{m_1} \quad (1)$$

The oil-in-water emulsions separation test was performed by a filtration process according to the reference <sup>1</sup>. The homogeneous oil-in-water emulsions are prepared

by mixing 9.9 ml of deionized water, 0.1 ml of oleic acid, 0.3 g of hexadecyl trimethyl ammonium bromide, and 5 mg of Sudan III and ultrasonicated for 10 min. Then, 20 mg of the prepared COF powder were filled into the head of a needle filter. The oil-in-water emulsion was fed through the filter by a plastic syringe under constant pressure.

#### **References**

1. L. Chen, J. Du, W. Zhou, H. Shen, L. Tan, C. Zhou and L. Dong, *Chem. Asian. J.*, 2020, **15**, 3421-3427.

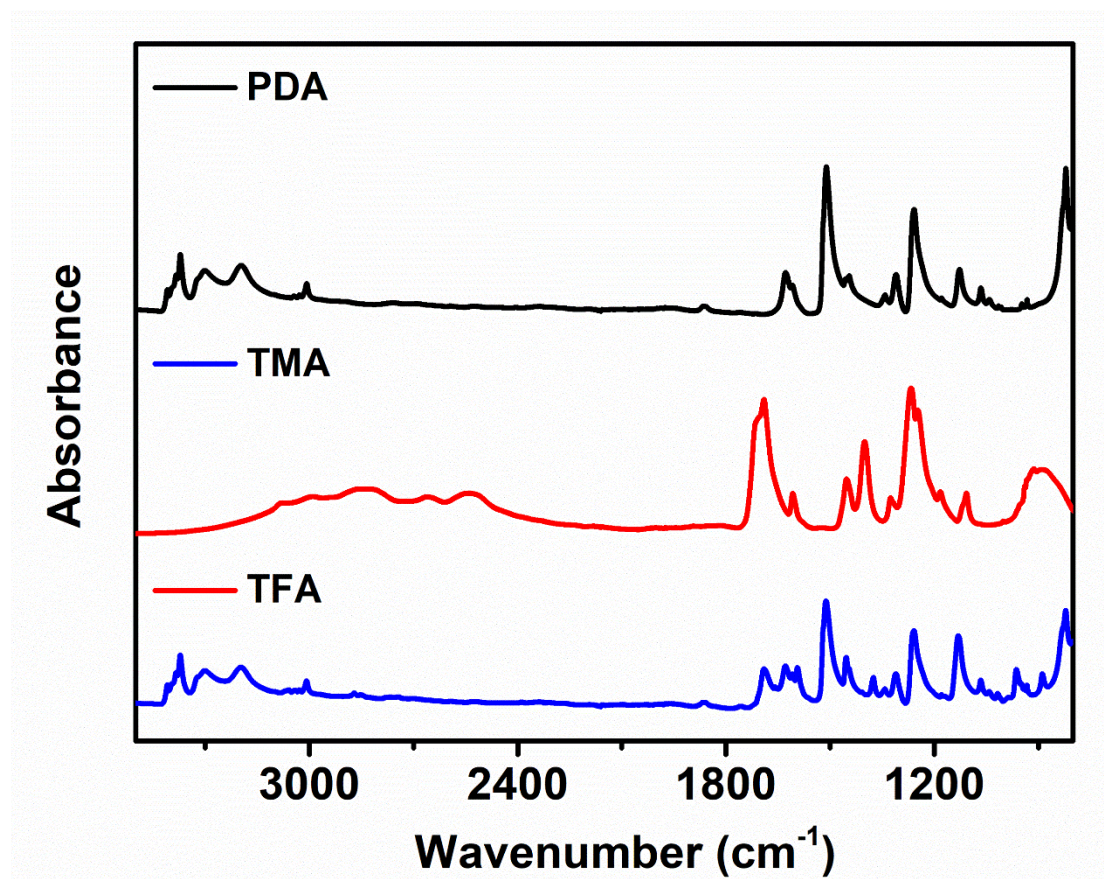

**Figure S1.** FTIR analysis of the precursor of PDA, TMA and TFA.

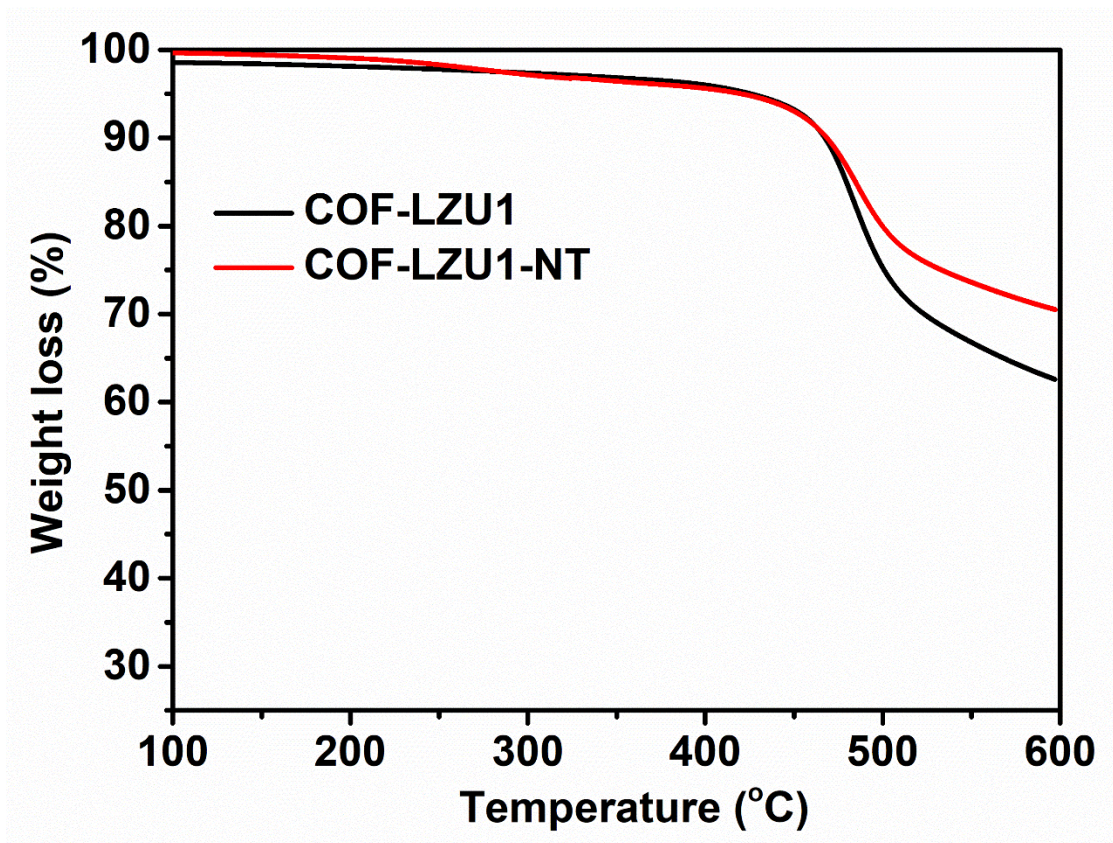

Figure S2. TG analysis of the COF-LZU1 and COF-LZU1-NT.



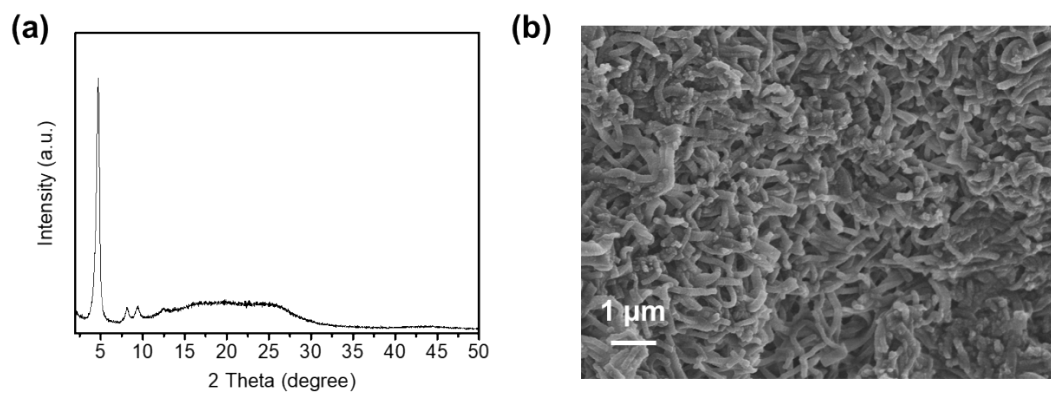

**Figure S3.** (a) XRD patterns and (b) SEM image of COF-LZU1-NT after calcination at 250°C for 1h under nitrogen atmosphere.

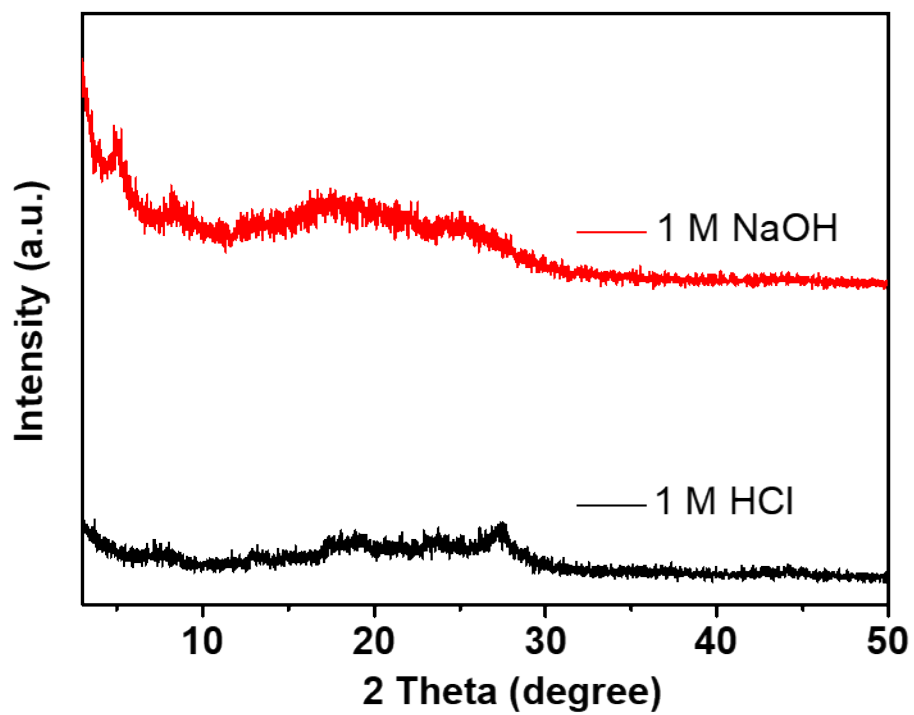

**Figure S4.** XRD patterns of COF-LZU1-NT after treatment in different conditions.

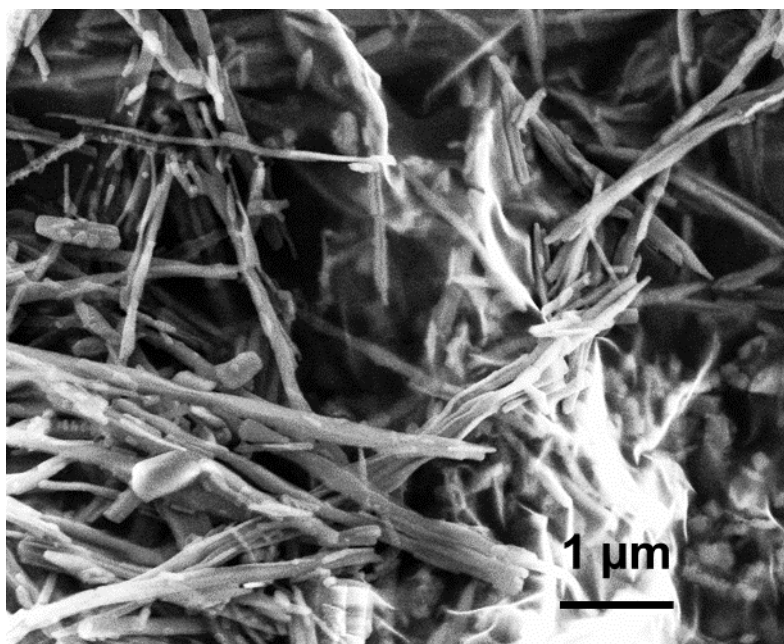

**Figure S5.** SEM image of TMA self-assemblies

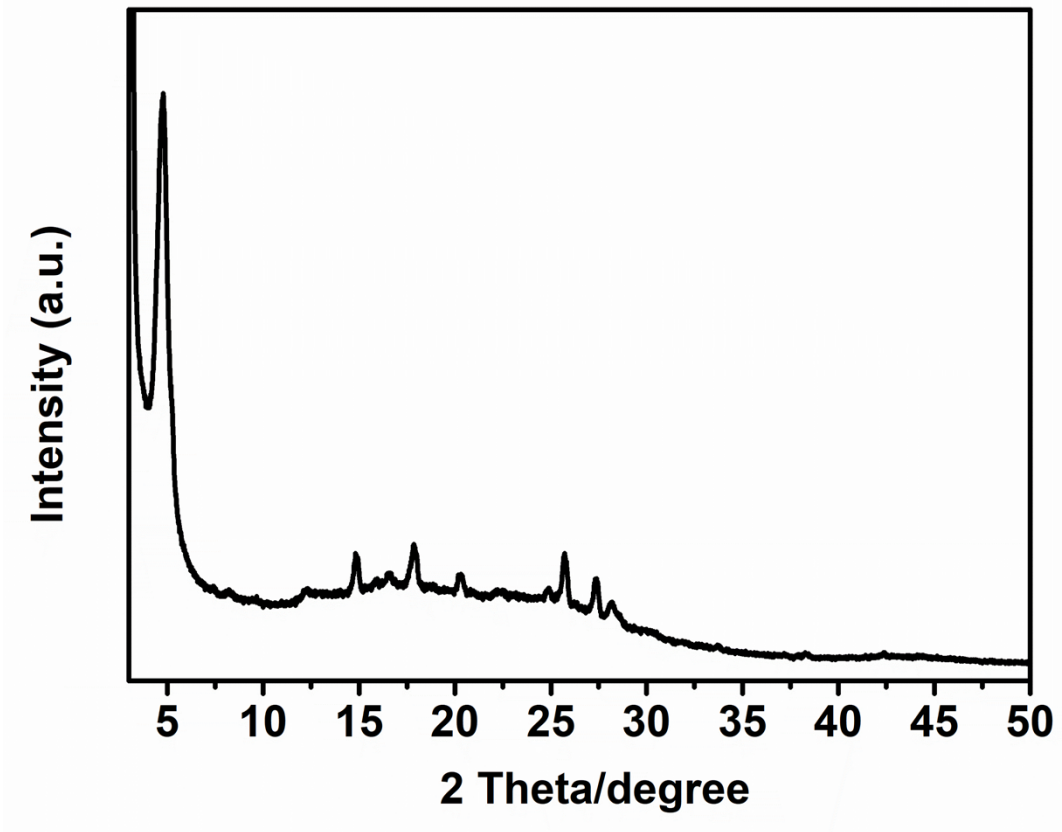

**Figure S6.** XRD pattern of COF-LZU1-NT with TMA template inside.

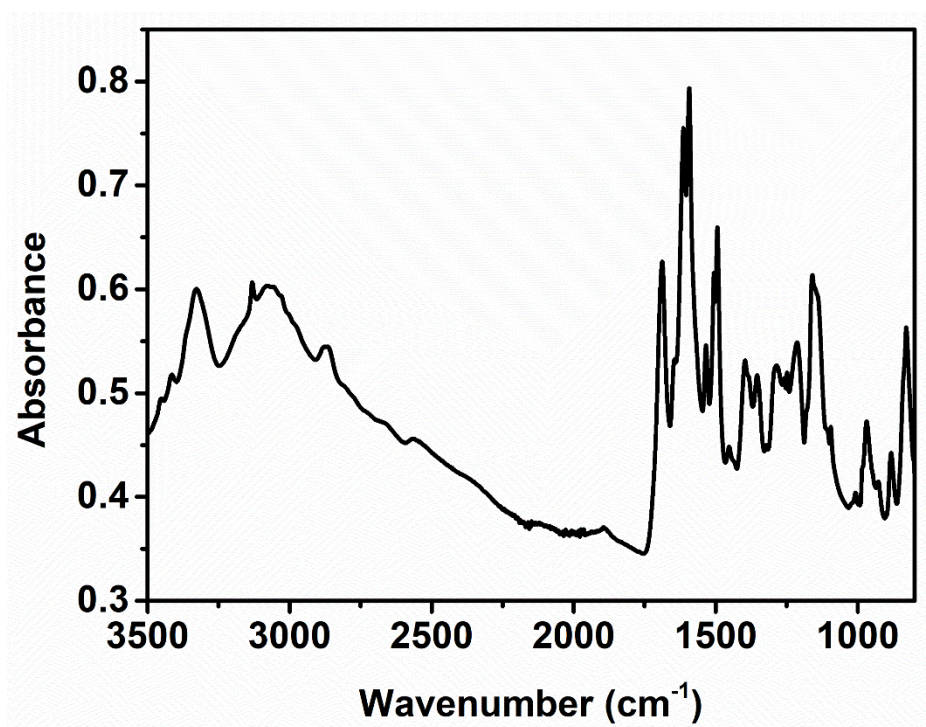

**Figure S7.** FTIR analysis of COF-LZU1-NT with TMA template inside.

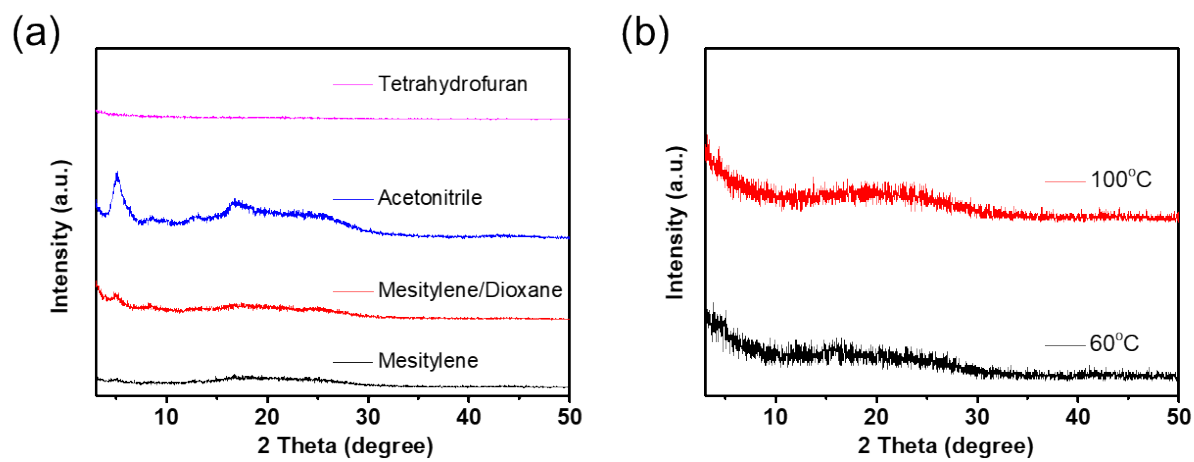

**Figure S8.** XRD patterns of COF-LZU1-NT synthesized under (a) various solvents and (b) different temperatures.

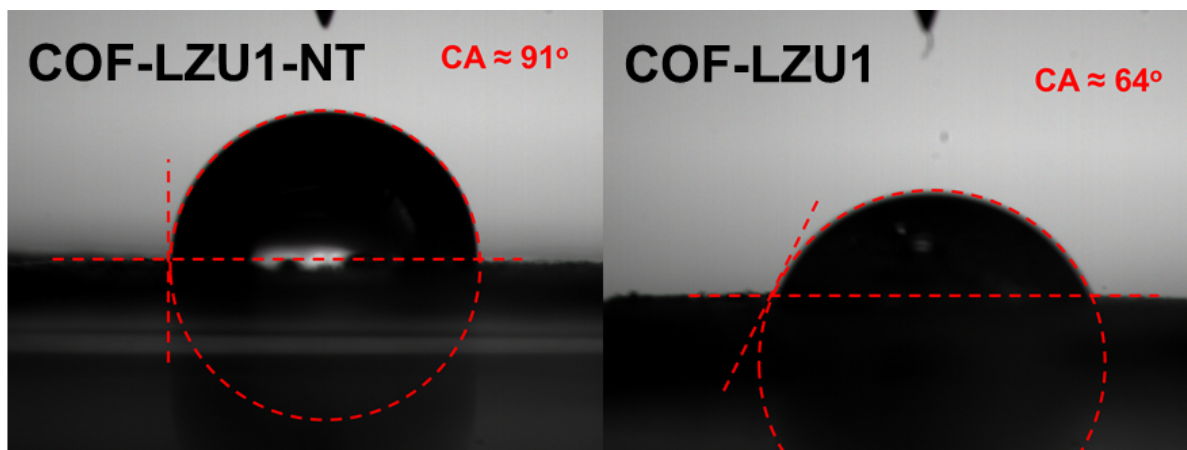

**Figure S9.** Contact angle of COF-LZU1-NT and COF-LZU1
